# Supplementary material for: MyHEARTSMAP: development and evaluation of a psychosocial self-assessment tool, for and by youth
Source: PubMed Central journal article supplement — BMJ Paediatr Open. 2019 Jul 24;3(1):e000493. doi: 10.1136/bmjpo-2019-000493 (PMC6668754; doi:10.1136/bmjpo-2019-000493), 2019-07-24
Supplement: bmjpo-2019-000493.reviewer_comments.pdf [file bmjpo-2019-000493.reviewer_comments.pdf]

## PEER REVIEW HISTORY

BMJ Paediatrics Open publishes all reviews undertaken for accepted manuscripts. Reviewers are asked to complete a checklist review form and are provided with free text boxes to elaborate on their assessment. These free text comments are reproduced below.

### ARTICLE DETAILS

|                            |                                                                                                                                           |
|----------------------------|-------------------------------------------------------------------------------------------------------------------------------------------|
| <b>TITLE (PROVISIONAL)</b> | MyHEARTSMAP: Development and evaluation of a psychosocial self-assessment tool, for and by youth                                          |
| <b>AUTHORS</b>             | Virk, Punit; Laskin, Samara; Gokiert, Rebecca; Richardson, Chris; Newton, Mandi; Stenstrom, Rob; Wright, Bruce; Black, Tyler; Doan, Quynh |

### VERSION 1 – REVIEW

|                        |                                                                                                               |
|------------------------|---------------------------------------------------------------------------------------------------------------|
| <b>REVIEWER</b>        | Reviewer name: Peter Flom<br>Institution and Country: Peter Flom Consulting, USA<br>Competing interests: None |
| <b>REVIEW RETURNED</b> | 13-May-2019                                                                                                   |

|                         |                                                                                                         |
|-------------------------|---------------------------------------------------------------------------------------------------------|
| <b>GENERAL COMMENTS</b> | I confine my remarks to statistical aspects of this paper. These were fine and I recommend publication. |
|-------------------------|---------------------------------------------------------------------------------------------------------|

|                        |                                                                                                                   |
|------------------------|-------------------------------------------------------------------------------------------------------------------|
| <b>REVIEWER</b>        | Reviewer name: Jennifer McAnuff<br>Institution and Country: Newcastle University, UK<br>Competing interests: None |
| <b>REVIEW RETURNED</b> | 16-Jun-2019                                                                                                       |

|                         |                                                                                                                                                                                                                 |
|-------------------------|-----------------------------------------------------------------------------------------------------------------------------------------------------------------------------------------------------------------|
| <b>GENERAL COMMENTS</b> | Thank you for this interesting and very clearly reported manuscript. I am happy to recommend it is accepted for publication in BMJ Paediatrics Open (subject to the usual screening by a statistical reviewer). |
|-------------------------|-----------------------------------------------------------------------------------------------------------------------------------------------------------------------------------------------------------------|
